# Supplementary material for: Morphology, Cytotoxicity, and Antimicrobial Activity of Electrospun Polycaprolactone Biomembranes with Gentamicin and Nano-Hydroxyapatite
Source: MDPI journal article supplement (doi:10.3390/membranes14010010), 2023-12-28
Supplement: s1 [file s1]

## Supporting Information

### for Membranes

# Morphology, Cytotoxicity, and Antimicrobial Activity of Electrospun Polycaprolactone Biomembranes with Gentamicin and Nano-Hydroxyapatite

Ioana-Codruta Mirica<sup>1</sup>, Gabriel Furtos<sup>2,\*</sup>, Marioara Moldovan<sup>2</sup>, Doina Prodan<sup>2</sup>, Ioan Petean<sup>3</sup>, Radu-Septimiu Campian<sup>1</sup>, Eموke Pall<sup>4</sup>, Ondine Lucaciu<sup>1</sup>

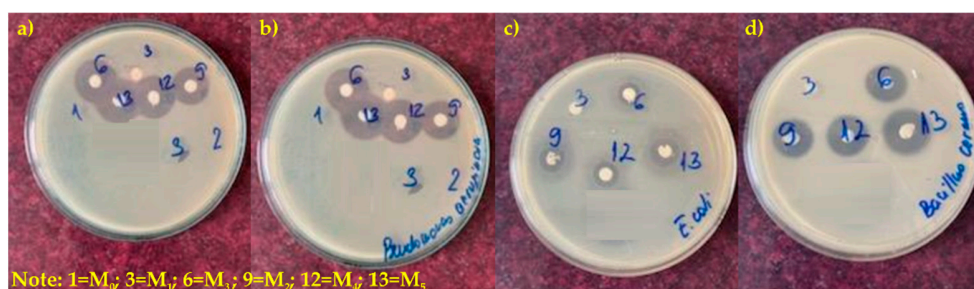

Figure S1. Disk diffusion assay on: a) *S. aureus*; b) *P. aeruginosa*; c) *E. coli* and d) *B. cereus*.
